# Supplementary material for: Facile synthesis of PtCu3alloy hexapods and hollow nanoframes as highly active electrocatalysts for methanol oxidation
Source: Royal Society of Chemistry journal article supplement (doi:10.1039/c6ce01695b), 2016-01-01
Supplement: c6ce01695b1.pdf [file c6ce01695b1.pdf]

## Supporting Information

### **Facile synthesis of PtCu<sub>3</sub> alloy hexapods and hollow nanoframes as highly active electrocatalysts for methanol oxidation**

Yaling Xiong,<sup>a,†</sup> Yanling Ma,<sup>b,†</sup> Zhuoqing Lin,<sup>a,†</sup> Qingfeng Xu,<sup>a</sup> Yucong Yan,<sup>a</sup> Hui Zhang,<sup>a,\*</sup>  
Jianbo Wu,<sup>b,\*</sup> and Deren Yang<sup>a,\*</sup>

*<sup>a</sup>State Key Laboratory of Silicon Materials, School of Materials Science & Engineering, and Cyrus  
Tang Center for Sensor Materials and Applications, Zhejiang University, Hangzhou, Zhejiang 310027,  
People's Republic of China.*

*<sup>b</sup>State Key Laboratory of Metal Matrix Composites, School of Materials Science and Engineering,  
Shanghai Jiao Tong University, 800 Dongchuan Rd, Shanghai, 200240, People's Republic of China.*

*<sup>†</sup>These authors contributed equally to this work.*

*\*Correspondence to: msezhanghui@zju.edu.cn, mseyang@zju.edu.cn, jianbowu@sjtu.edu.cn.*

**Table S1.** ICP-AES data and ECSA of the PtCu hexapods and hollow nanoframes as well as the commercial Pt/C.

| Samples           | $n_{\text{Pt}}:n_{\text{Cu}}$ * | Pt/Cu atomic ratio | composition                       | ECSA( $\text{m}^2/\text{g}_{\text{pt}}$ )** |
|-------------------|---------------------------------|--------------------|-----------------------------------|---------------------------------------------|
| Hexapods          | 1:3                             | 1:2.58             | Pt <sub>28</sub> Cu <sub>72</sub> | 34.2                                        |
| Hollow nanoframes | 1:3                             | 1:2.49             | Pt <sub>29</sub> Cu <sub>71</sub> | 73.1                                        |
| Pt/C              | /                               | /                  | /                                 | 33.9                                        |

\*: Molar ratio between the Pt and Cu salt precursors fed in the synthesis.

\*\* : The ECSA was calculated from CV curves in Figure S4.

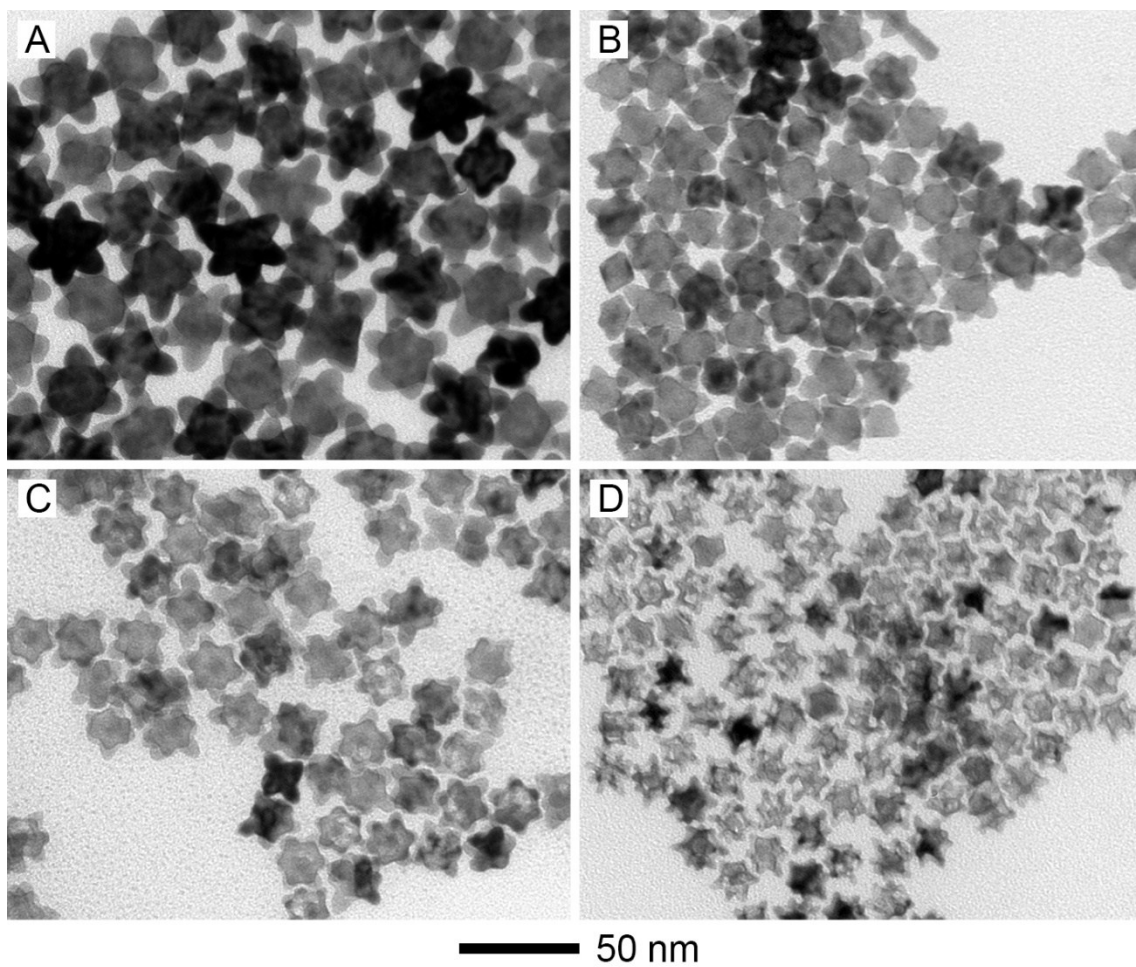

**Figure S1.** TEM images of the PtCu nanostructures prepared using the standard procedure, except for different temperatures: (a) 220, (b) 210, (c) 200, and (d) 190 °C.

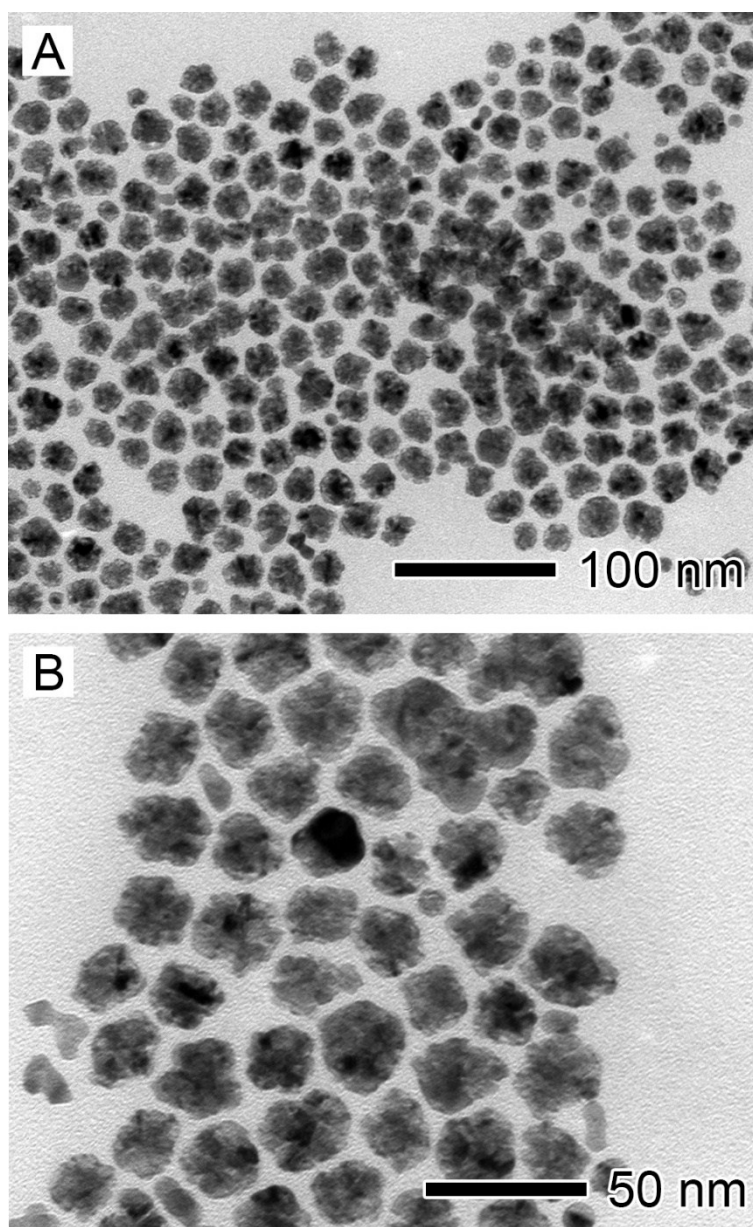

**Figure S2.** (A, B) TEM images of the PtCu nanocrystals prepared by replacing  $\text{H}_2\text{PtCl}_6$  with  $\text{Pt}(\text{acac})_2$  under otherwise identical experimental conditions.

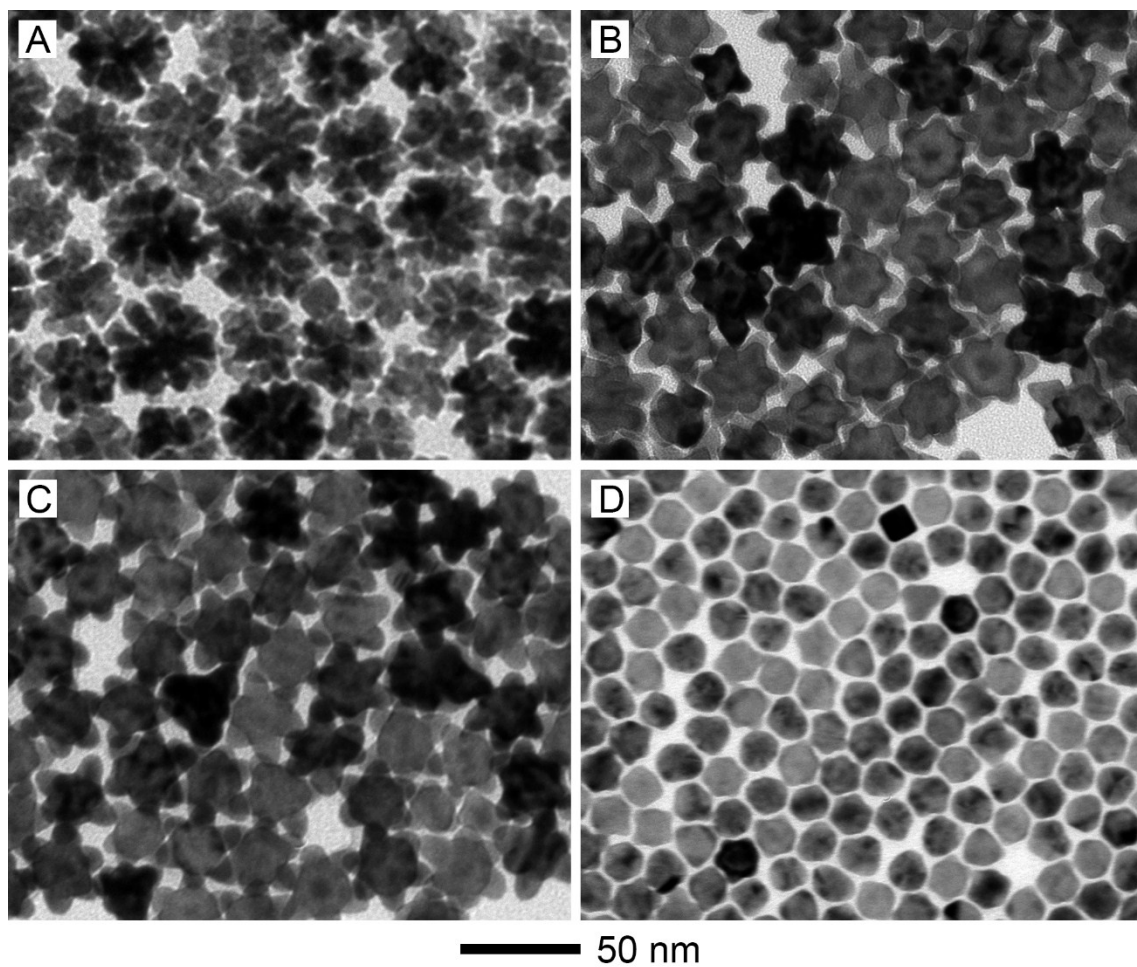

**Figure S3.** TEM images of PtCu<sub>3</sub> nanocrystals prepared using the standard procedure, except for the different amount of TOPO: (A) in the absence of TOPO, (B) 55 mg, (C) 110 mg and (D) 220 mg.

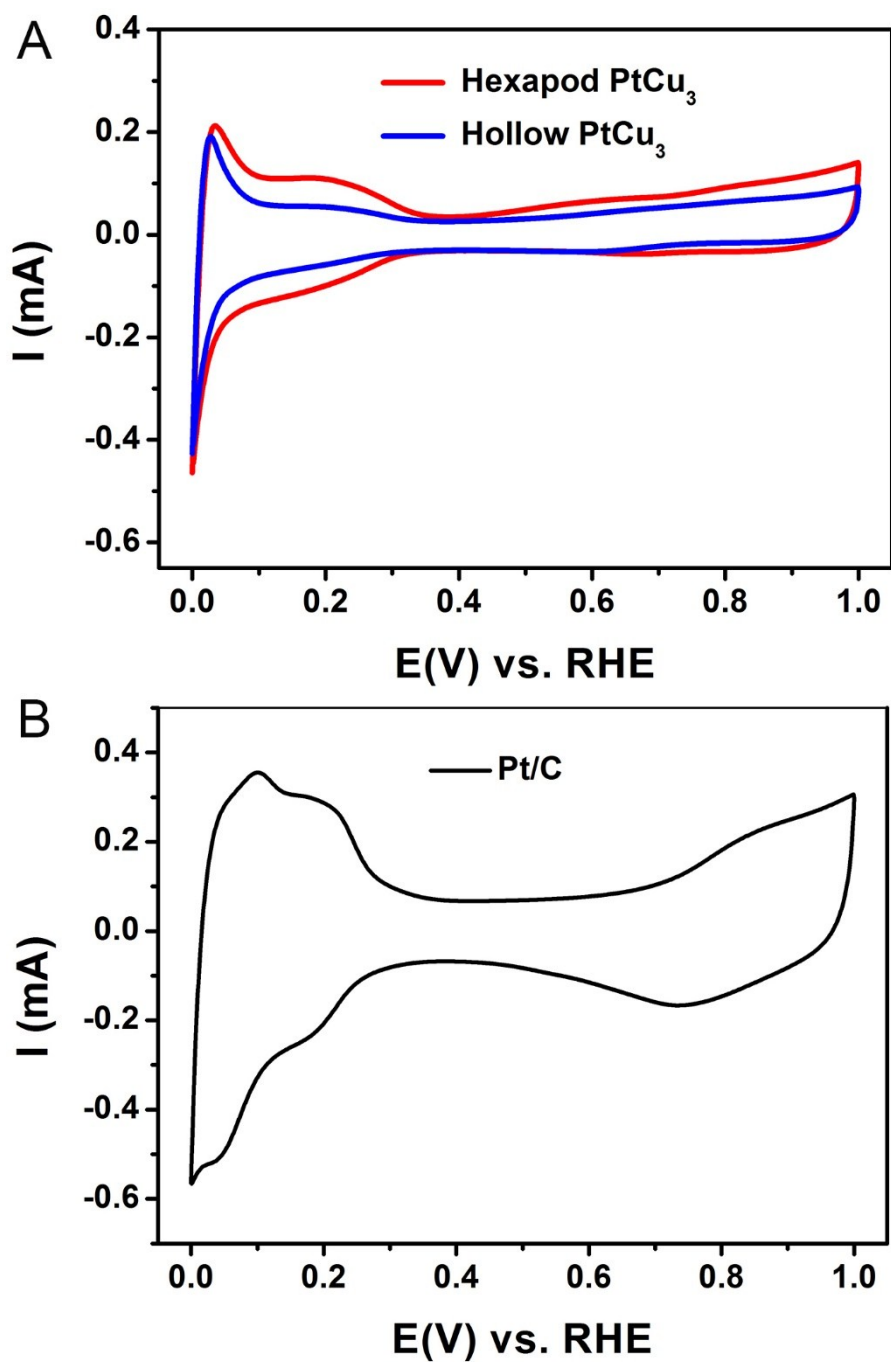

**Figure S4.** Cyclic voltammograms (CVs) of (A) PtCu<sub>3</sub> alloy hexapods and hollow nanoframes and (B) commercial Pt/C in an Ar-saturated 0.1 M HClO<sub>4</sub> solution at a sweep rate of 50 mV/s.
